# Supplementary material for: An interesting possibility of forming special hole stepping stones with high-stacking aromatic rings in proteins: three-π five-electron and four-π seven-electron resonance bindings
Source: Royal Society of Chemistry journal article supplement (doi:10.1039/d1ra05341h), 2021-01-01
Supplement: d1ra05341h1.pdf [file d1ra05341h1.pdf]

## Supporting Information

### An Interesting Possibility of Forming Special Hole Stepping Stones by High-Stacking Aromatic Rings in Proteins: Three- $\pi$ Five-Electron and Four- $\pi$ Seven-Electron Resonance Bindings

Xin Li<sup>#</sup>, Weichao Sun<sup>#</sup>, Xin Qin, Yuxin Xie, Nian Liu, Xin Luo, Yuanying Wang, Xiaohua Chen\*

Chongqing Key Laboratory of Theoretical and Computational Chemistry, School of Chemistry and Chemical Engineering,  
Chongqing University, Chongqing, 401331, P.R. China

National-Municipal Joint Engineering Laboratory for Chemical Process Intensification and Reaction, Chongqing University,  
Chongqing, 401331, P.R. China

#### 1. Three- $\pi$ and four- $\pi$ structures in protein crystal structures

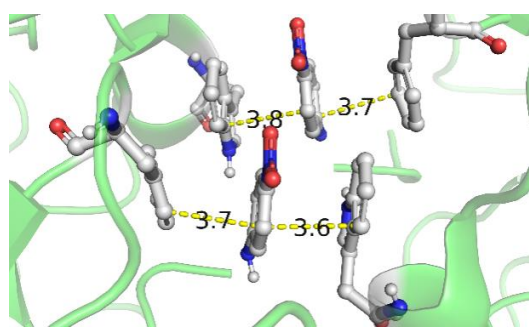

1RMH: F60-NIT6-W121

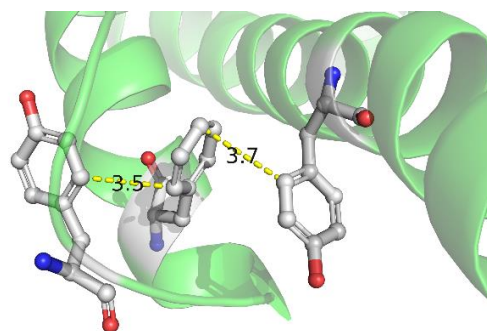

1HJN: Y169-F175-Y218

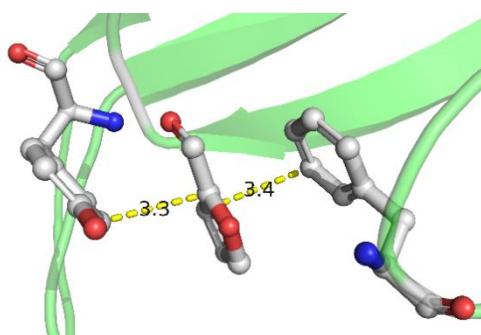

5HJB: Y78-FOA101-F59

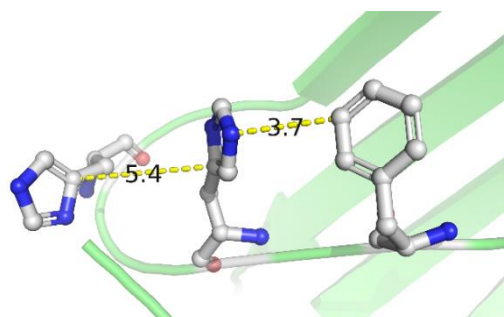

6MIL: H116-F105-H107

<sup>#</sup>Li and Sun contributes equally to this work. \*The corresponding authors: Xiaohua Chen, [chxh7@cqu.edu.cn](mailto:chxh7@cqu.edu.cn)

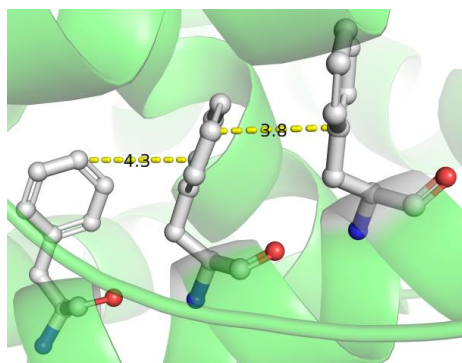

2B11:F266-F262-F198

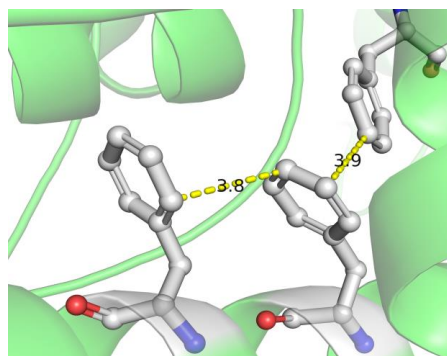

2B11:F758-F762-F766

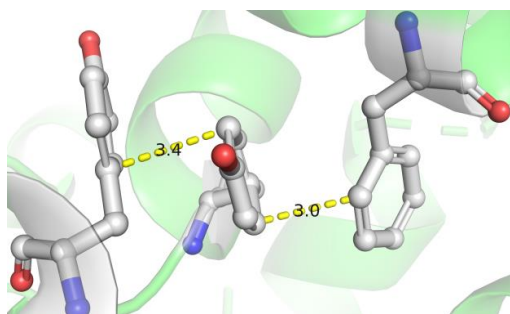

2PCB:F258-F262-F266

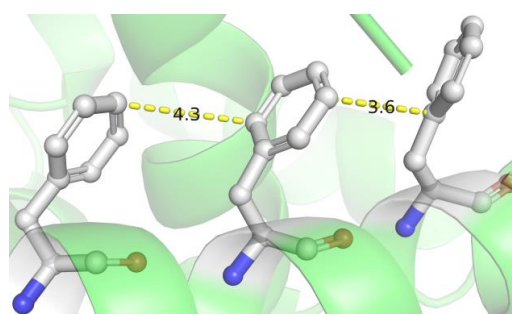

2PCB:Y36-Y42-F91

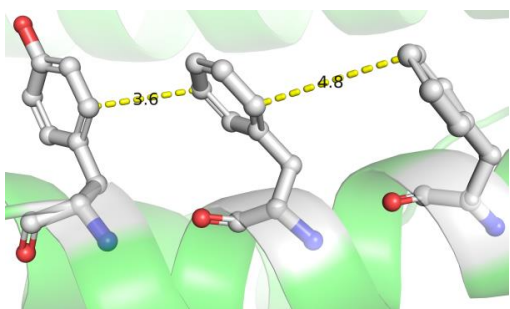

2PCB:F23-F286-Y284

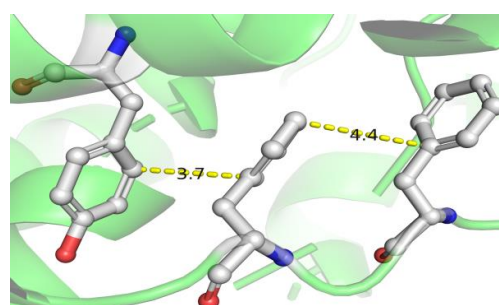

3U2M:Y140-F132-F136

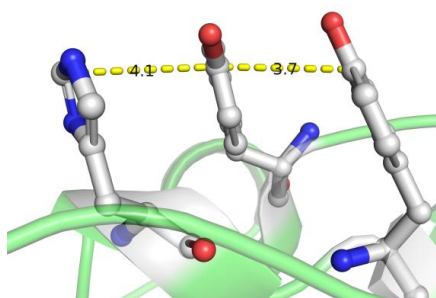

3W5V:H78-Y23-Y80

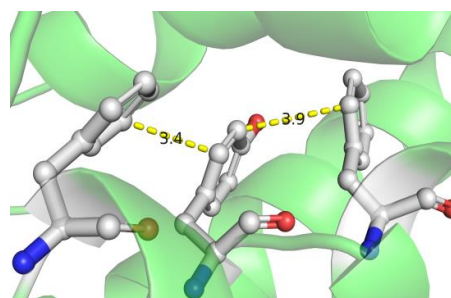

3W9C:F150-Y154-F158

**Figure S1.** The three- $\pi$  stacking structures in the crystal structures of proteins by surveying the protein data bank (PDB). The markings under the picture include the code of PDB and three aromatic amino acids taking part in forming three- $\pi$  cluster. Notwithstanding the aromatic rings are not always parallelly aligned well, the movement of proteins may promote the transient formation of the three- $\pi$  stacking structures to accept a hole.

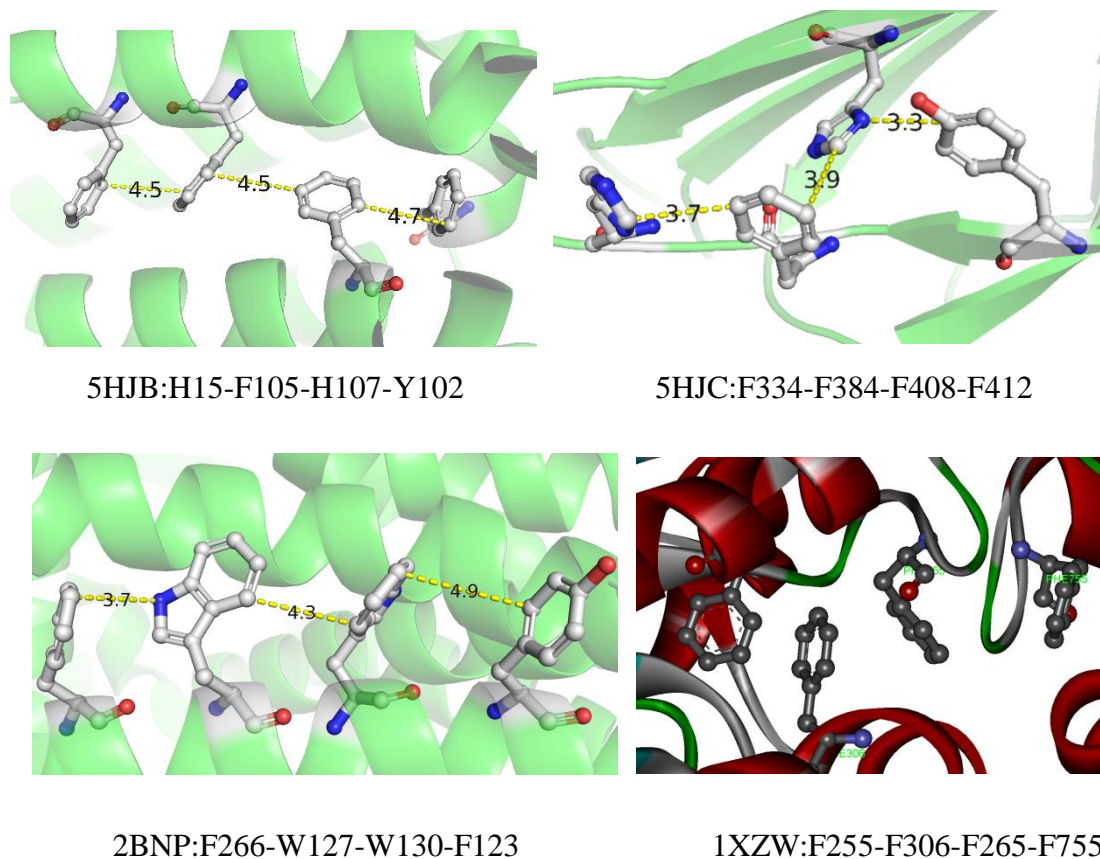

**Figure S2.** Four examples of four- $\pi$  stacking structures in the crystal structures of proteins by surveying the protein data bank (PDB).

## 2. Comparison of different DFT functionals

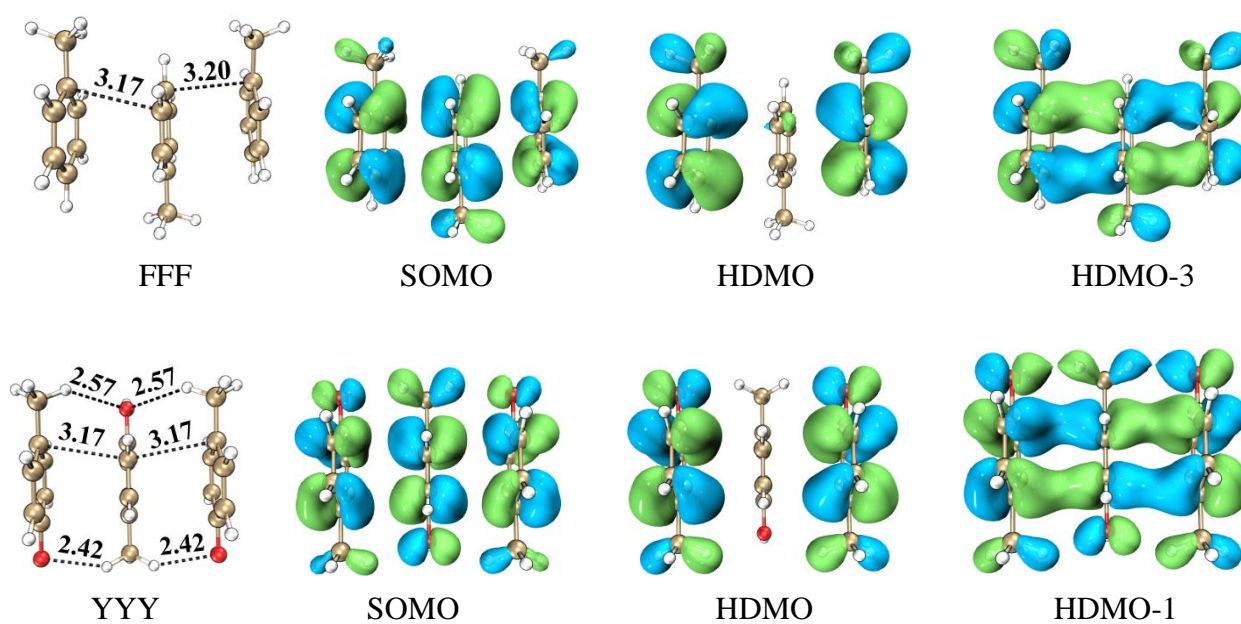

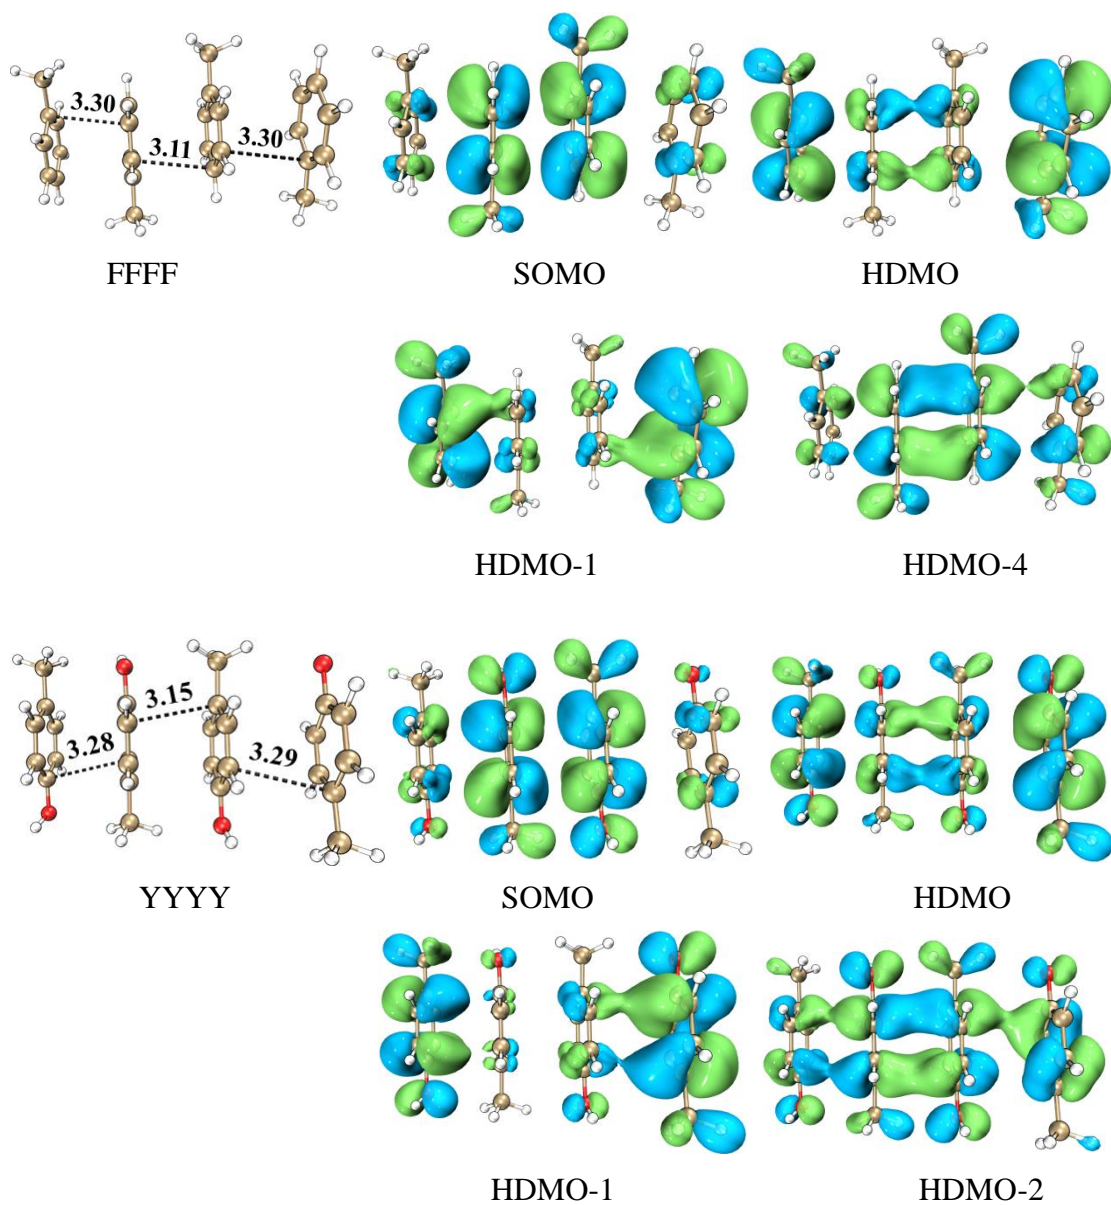

**Figure S3.** The formations of three- $\pi$  five-electron bindings in YYY and FFF and four- $\pi$  seven-electron bindings in YYYY and FFFF confirmed by the  $\omega$ B97XD/6-31+g(d,p) optimization.

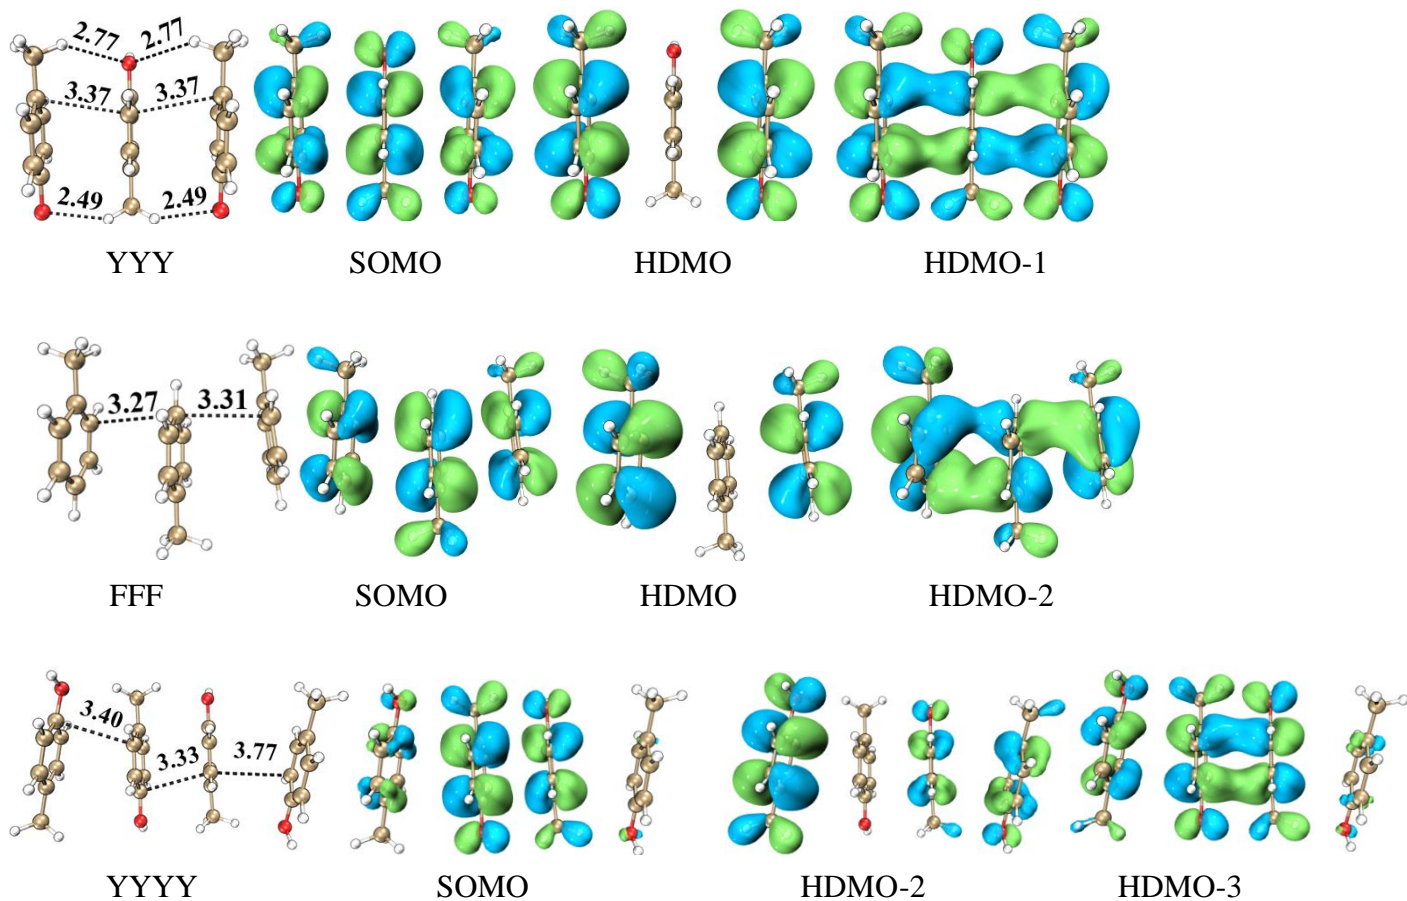

**Figure S4.** The YYY and FFF three- $\pi$  and YYYYY four- $\pi$  systems are optimized by the CAM-B3LYP/6-31+g(d,p) method. It should be noted that the distances between the neighboring aromatic rings in YYY, FFF and YYYYY obtained from the long-range corrected CAM-B3LYP functional are larger than the corresponding distances obtained from the M06-2X functional.

### 3. Tables

**Table S1.** Shortest Distance between the Neighboring Aromatic Rings ( $d_{\min}$ , in Å), Binding Energy (BE, in kcal/mol), Vertical Ionization Potential ( $IP_v$ , in eV) and Decreasing Value of  $IP$  ( $\Delta IP$ , in eV) compared to the corresponding monomer for all the YYY, FFF, YYYYY stacking systems obtained by three functionals, M06-2X,  $\omega$ B97XD and CAM-B3LYP.

| Species        |                  | FFF       | YYY       | FFFF           | YYYY           |
|----------------|------------------|-----------|-----------|----------------|----------------|
| M06-2X         | $d_{\min}$ (Å)   | 3.18/3.19 | 3.11/3.12 | 3.31/3.13/3.23 | 3.16/3.29/3.77 |
|                | BE(kcal/mol)     | 11.57     | 12.23     | 8.03           | 10.42          |
|                | IP(eV)           | 7.57      | 7.02      | 7.42           | 6.74           |
|                | $\Delta IP$ (eV) | 1.07      | 0.88      | 1.22           | 1.16           |
| $\omega$ B97XD | $d_{\min}$ (Å)   | 3.17/3.20 | 3.17/3.17 | 3.30/3.11/3.30 | 3.28/3.15/3.29 |
|                | BE(kcal/mol)     | 11.53     | 12.64     | 8.78           | 10.01          |
|                | IP(eV)           | 7.42      | 6.87      | 7.26           | 6.62           |
|                | $\Delta IP$ (eV) | 1.42      | 1.33      | 1.58           | 1.58           |
| CAM-B3LYP      | $d_{\min}$ (Å)   | 3.27/3.31 | 3.37/3.37 | /              | 3.40/3.33/3.77 |
|                | BE(kcal/mol)     | 4.25      | 5.16      | /              | 3.31           |
|                | IP(eV)           | 7.58      | 7.03      | /              | 6.79           |
|                | $\Delta IP$ (eV) | 1.29      | 1.22      | /              | 1.46           |

Note: As shown in Figure S3 and S4, the single occupied molecular orbitals (SOMO) delocalize over the three parallel aromatic rings for the YYY and FFF three- $\pi$  stacking systems, which indicates that the three- $\pi$ , five-electron bindings can form in the three close aromatic rings according to the calculations of the three functionals, M06-2X,  $\omega$ B97XD and CAM-B3LYP. One trend that has been observed is that CAM-B3LYP gives the close distances between the neighboring rings that are typically longer than those of M06-2X, while  $\omega$ B97XD gives the close distances that are shorter than those of M06-2X. This may be attributed to that the CAM-B3LYP functional only contains the long-range correction and the  $\omega$ B97XD functional includes both the long-range and dispersion corrections. Then, the former underestimates the binding strength between two neighbor aromatic rings. The corresponding binding energies, as shown in Table S1, also confirms this conjecture. More importantly, the trend in the vertical ionization potential ( $IP_v$ ) of YYY and FFF are well consistent for the three functionals, as shown in Table S1. These consistences confirm that it is suitable to use M06-2X to examine the relay function of the high  $\pi$ -stacking structures in proteins.

**Table S2.** Vertical Ionization Potential ( $IP_v$ , in eV) and Decreasing Value of  $IP_v$  ( $\Delta IP$ , in eV) compared to the corresponding monomer in the three continuum solvents, including diethyl ether ( $\epsilon= 4.335$ ), dichloroethane (DCE) ( $\epsilon= 10.36$ ) and water ( $\epsilon= 78.36$ ) obtained at the B3LYP/6-311+G(d,p) for all the structures.

| Species            | F    | Y    | H    | W    | YYY   | FFF   | HHH    | YFY    | YHY  |
|--------------------|------|------|------|------|-------|-------|--------|--------|------|
| $IP_v$ -ether      | 7.40 | 7.00 | 6.62 | 6.32 | 5.83  | 6.37  | 5.37   | 6.11   | 5.68 |
| $\Delta IP$ -ether | \    | \    | \    | \    | 1.17  | 1.03  | 1.26   | 0.89   | 0.94 |
| $IP_v$ -DCE        | 7.12 | 6.73 | 6.32 | 6.07 | 5.61  | 6.15  | 5.16   | 5.91   | 5.48 |
| $\Delta IP$ -DCE   | \    | \    | \    | \    | 1.12  | 0.97  | 1.16   | 0.82   | 0.84 |
| $IP_v$ -water      | 6.94 | 6.56 | 6.14 | 5.91 | 5.48  | 6.01  | 5.03   | 5.79   | 5.36 |
| $\Delta IP$ -water | \    | \    | \    | \    | 1.08  | 0.93  | 1.10   | 0.78   | 0.78 |
| Species            | YWY  | FYY  | WYY  | HYY  | FYF   | FHF   | FFY    | HFH    | HYH  |
| $IP_v$ -ether      | 5.28 | 5.84 | 5.77 | 5.63 | 5.86  | 5.72  | 6.05   | 6.07   | 5.81 |
| $\Delta IP$ -ether | 1.04 | 1.16 | 0.55 | 0.99 | 1.14  | 0.90  | 0.95   | 0.56   | 0.81 |
| $IP_v$ -DCE        | 5.07 | 5.62 | 5.58 | 5.43 | 5.64  | 5.49  | 5.82   | 5.85   | 5.58 |
| $\Delta IP$ -DCE   | 1.00 | 1.11 | 0.50 | 0.89 | 1.09  | 0.84  | 0.91   | 0.48   | 0.74 |
| $IP_v$ -water      | 4.93 | 5.49 | 5.46 | 5.31 | 5.49  | 5.34  | 5.68   | 5.71   | 5.44 |
| $\Delta IP$ -water | 0.98 | 1.08 | 0.46 | 0.83 | 1.07  | 0.79  | 0.89   | 0.43   | 0.70 |
| Species            | FHY  | FYH  | FWY  | YFH  | WHW   | FFFF  | YYYY   | HHHH   | YFHY |
| $IP_v$ -ether      | 5.76 | 5.89 | 5.31 | 6.05 | 5.09  | 6.30  | 5.67   | 5.30   | 5.74 |
| $\Delta IP$ -ether | 0.86 | 0.73 | 1.01 | 0.57 | 1.23  | 1.10  | 1.34   | 1.33   | 0.88 |
| $IP_v$ -DCE        | 5.54 | 5.66 | 5.09 | 5.86 | 5.34  | 6.09  | 5.47   | 5.11   | 5.54 |
| $\Delta IP$ -DCE   | 0.78 | 0.66 | 0.98 | 0.47 | 0.73  | 1.03  | 1.26   | 1.22   | 0.78 |
| $IP_v$ -water      | 5.40 | 5.52 | 4.95 | 5.74 | 5.22  | 5.96  | 5.35   | 4.99   | 5.42 |
| $\Delta IP$ -water | 0.73 | 0.61 | 0.96 | 0.40 | 0.70  | 0.98  | 1.22   | 1.15   | 0.72 |
| Species            | FYYY | FYFY | YFFY | FFFF | YYYYY | HHHHH | FFFFFF | YYYYYY |      |

|                        |      |      |      |      |      |      |      |      |
|------------------------|------|------|------|------|------|------|------|------|
| IP <sub>v</sub> -ether | 5.73 | 5.82 | 6.26 | 6.28 | 5.67 | 5.36 | 6.27 | 5.63 |
| ΔIP-ether              | 1.27 | 1.18 | 0.74 | 1.12 | 1.33 | 1.26 | 1.13 | 1.37 |
| IP <sub>v</sub> -DCE   | 5.53 | 5.61 | 6.08 | 6.07 | 5.48 | 5.18 | 5.92 | 5.46 |
| ΔIP-DCE                | 1.20 | 1.12 | 0.64 | 1.04 | 1.25 | 1.15 | 0.81 | 1.27 |
| IP <sub>v</sub> -water | 5.40 | 5.48 | 5.98 | 5.94 | 5.36 | 5.06 | 5.94 | 5.34 |
| ΔIP-water              | 1.16 | 1.09 | 0.59 | 1.00 | 1.21 | 1.07 | 1.00 | 1.22 |

  

| Species                | YYY-p | FYY-p | HYY-p | YHY-p | FHF-p | FHY-p | YYYY-p | FFFF-p | YFYY-p |
|------------------------|-------|-------|-------|-------|-------|-------|--------|--------|--------|
| IP <sub>v</sub> -ether | 5.81  | 5.93  | 5.75  | 5.89  | 5.93  | 5.91  | 5.90   | 5.90   | 5.88   |
| ΔIP-ether              | 1.19  | 1.07  | 0.87  | 0.73  | 0.69  | 0.71  |        | 1.1    | 1.12   |
| IP <sub>v</sub> -DCE   | 5.62  | 5.74  | 5.58  | 5.72  | 5.74  | 5.73  | 5.74   | 5.74   | 5.69   |
| ΔIP-DCE                | 1.10  | 0.99  | 0.75  | 0.60  | 0.59  | 0.59  |        | -0.99  | 1.04   |
| IP <sub>v</sub> -water | 5.50  | 5.61  | 5.47  | 5.61  | 5.62  | 5.61  | 5.65   | 5.65   | 5.56   |
| ΔIP-water              | 1.06  | 0.95  | 0.67  | 0.52  | 0.52  | 0.52  |        | 0.92   | 1.00   |

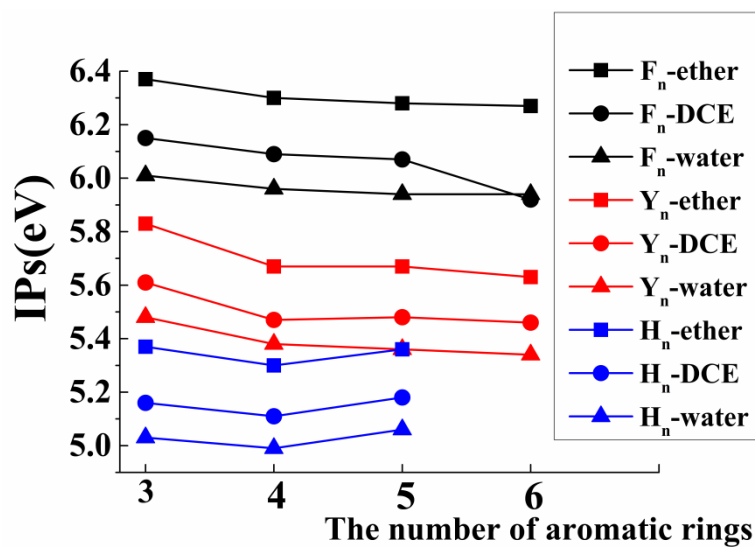

**Figure S5.** The changing trend of the vertical ionization energies (IP) with the increasing number of the same aromatic rings in the high  $\pi$ - $\pi$  packing systems in different continuum solvents. Square, circular and triangle emblemize the IPs calculated in diethyl ether, dichloroethane and water, respectively.



**Table S3.** Shortest Distances between Each Aromatic Ring( $d_{min}$ ), Binding Energy Values(BEs), Vertical Ionization Potential ( $IP_v$ , in eV) and Decreasing Value of  $IP$  ( $\Delta IP$ , in eV ) Compared to the Corresponding Monomer.

| Species               | FPheF     | PheFPhe   | PheHPhe   | FHisH     | FTyrH     | FHisY     | FTyrY     |
|-----------------------|-----------|-----------|-----------|-----------|-----------|-----------|-----------|
| $d_{min}(\text{\AA})$ | 3.16/3.23 | 3.11/3.07 | 2.99/2.99 | 3.15/2.89 | 3.15/2.99 | 3.12/2.94 | 3.23/2.96 |
| BE(kcal/mol)          | 15.96     | 11.74     | 13.33     | 15.68     | 16.53     | 17.26     | 15.35     |
| $IP_v$ (eV)           | 7.42      | 7.61      | 7.05      | 6.70      | 6.80      | 7.04      | 6.86      |
| $\Delta IP$ (eV)      | 0.63      | 0.44      | 1.00      | 1.36      | 1.02      | 1.02      | 0.96      |
| Species               | HPheH     | HTyrH     | WTyrW     | TyrHTyr   | TyrY Tyr  | YTyrY     |           |
| $d_{min}(\text{\AA})$ | 3.09/3.00 | 3.06/2.98 | 3.10/3.16 | 3.06/3.09 | 3.16/3.01 | 3.11/3.16 |           |
| BE(kcal/mol)          | 23.64     | 21.57     | 19.70     | 24.26     | 18.31     | 19.32     |           |
| $IP_v$ (eV)           | 7.24      | 6.94      | 6.67      | 6.49      | 6.61      | 6.99      |           |
| $\Delta IP$ (eV)      | 0.58      | 0.88      | 0.68      | 1.33      | 1.21      | 0.83      |           |

Denote: Xxx (Phe, His, Tyr and Trp) represent the structure of the amino acid has the main peptide chain.

#### 4. Electron Transition Spectra

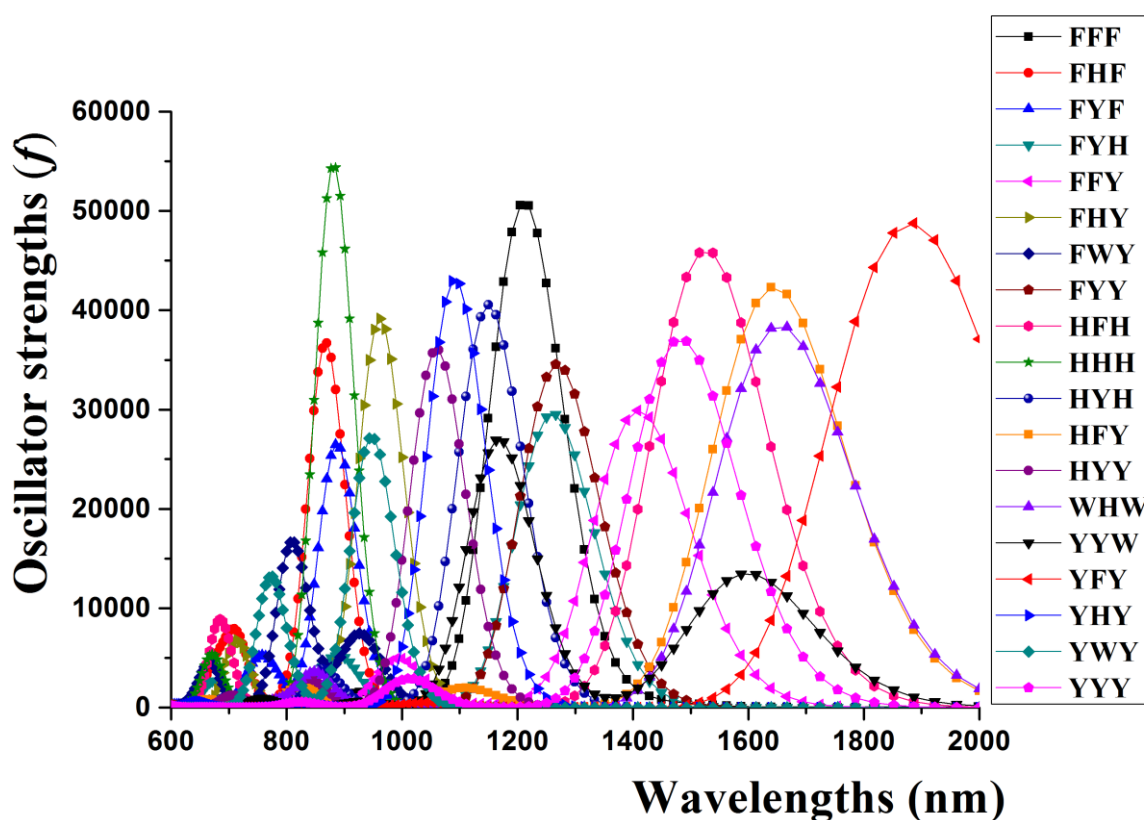

**Figure S6.** Electron transition spectra of 19 simple three- $\pi$  structures obtained at M06-2X/6-311++G(d,p) //M06-2X/6-31+G(d,p) level of theory. The widths at half-height ( $\Delta_{1/2}$ ) are assumed to be equal 1500  $\text{cm}^{-1}$ . Assignments of each electron transition spectra for these models are given below the spectrum.

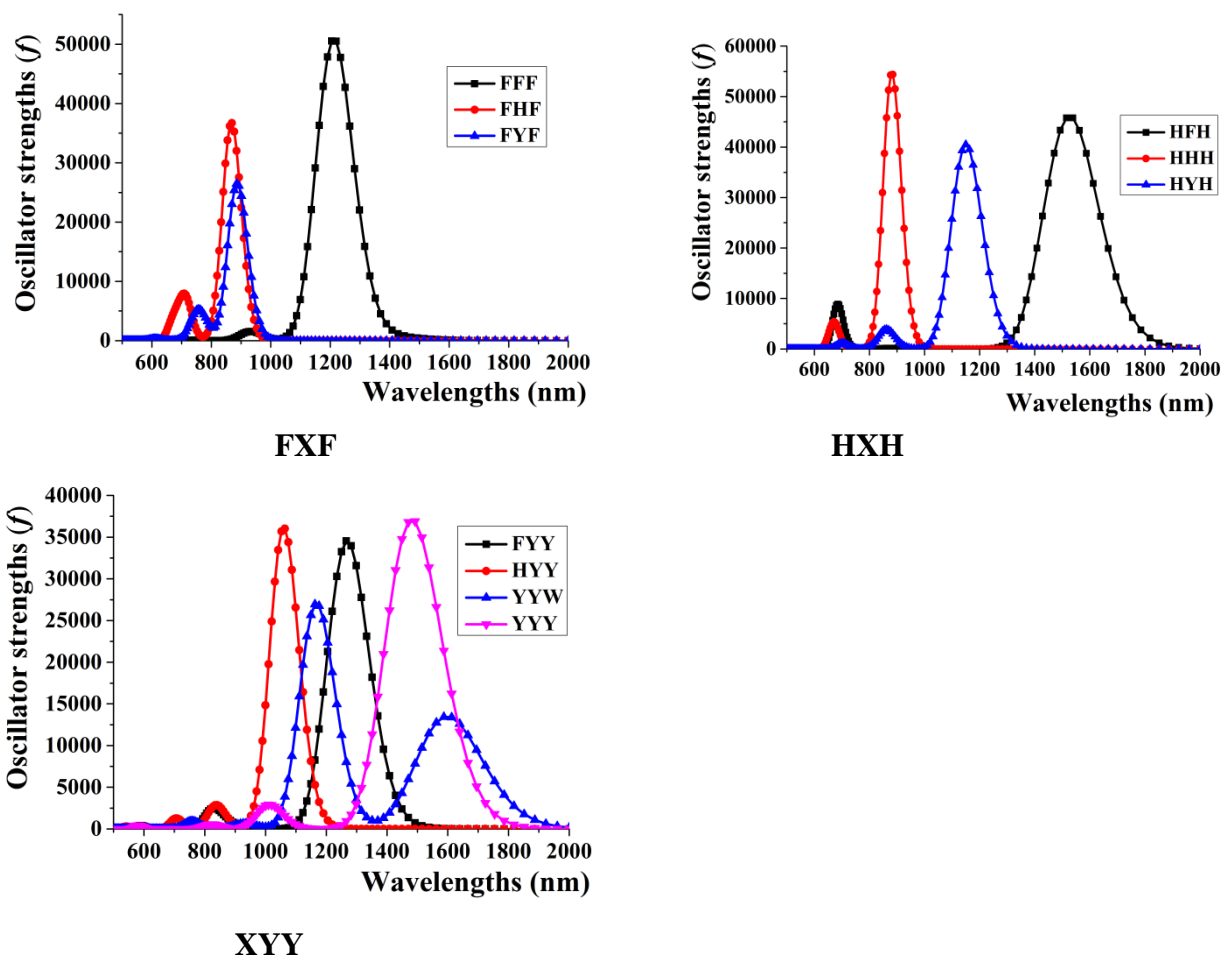

**Figure S7.** Two characteristic peaks  $[(1\sigma)^2 \rightarrow (1\sigma^*)^1]$  and  $(2\sigma)^2 \rightarrow (1\sigma^*)^1$  of the  $\pi \cdot \cdot \pi : \pi \leftrightarrow \pi : \pi \cdot \cdot \pi$  resonance binding for FFX, HXH and XYY. It is shown that the maximal absorbing spectrum ( $\lambda_{\max}$ ) exhibits an obvious red shift with the increasing the size of the aromatic ring of X.

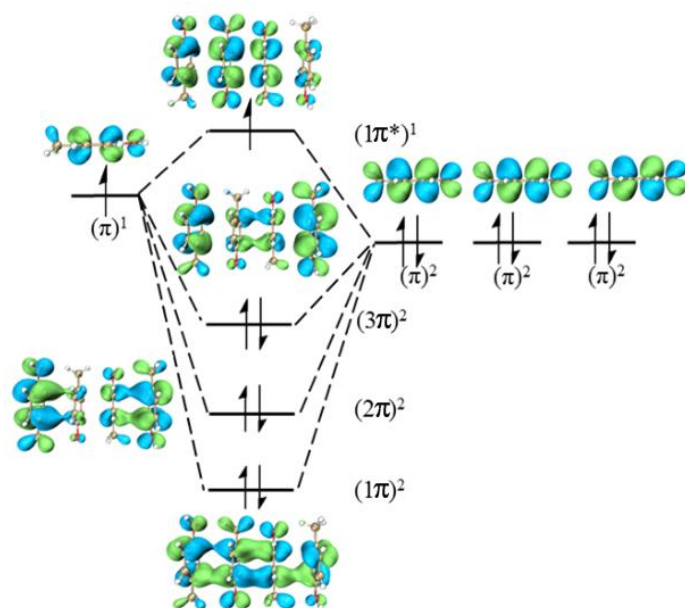

**Figure S8.** Exhibition of forming seven-electron binding via each highest occupied molecular orbital of the side chains of four Tyrs

## 5. Structures and MOs

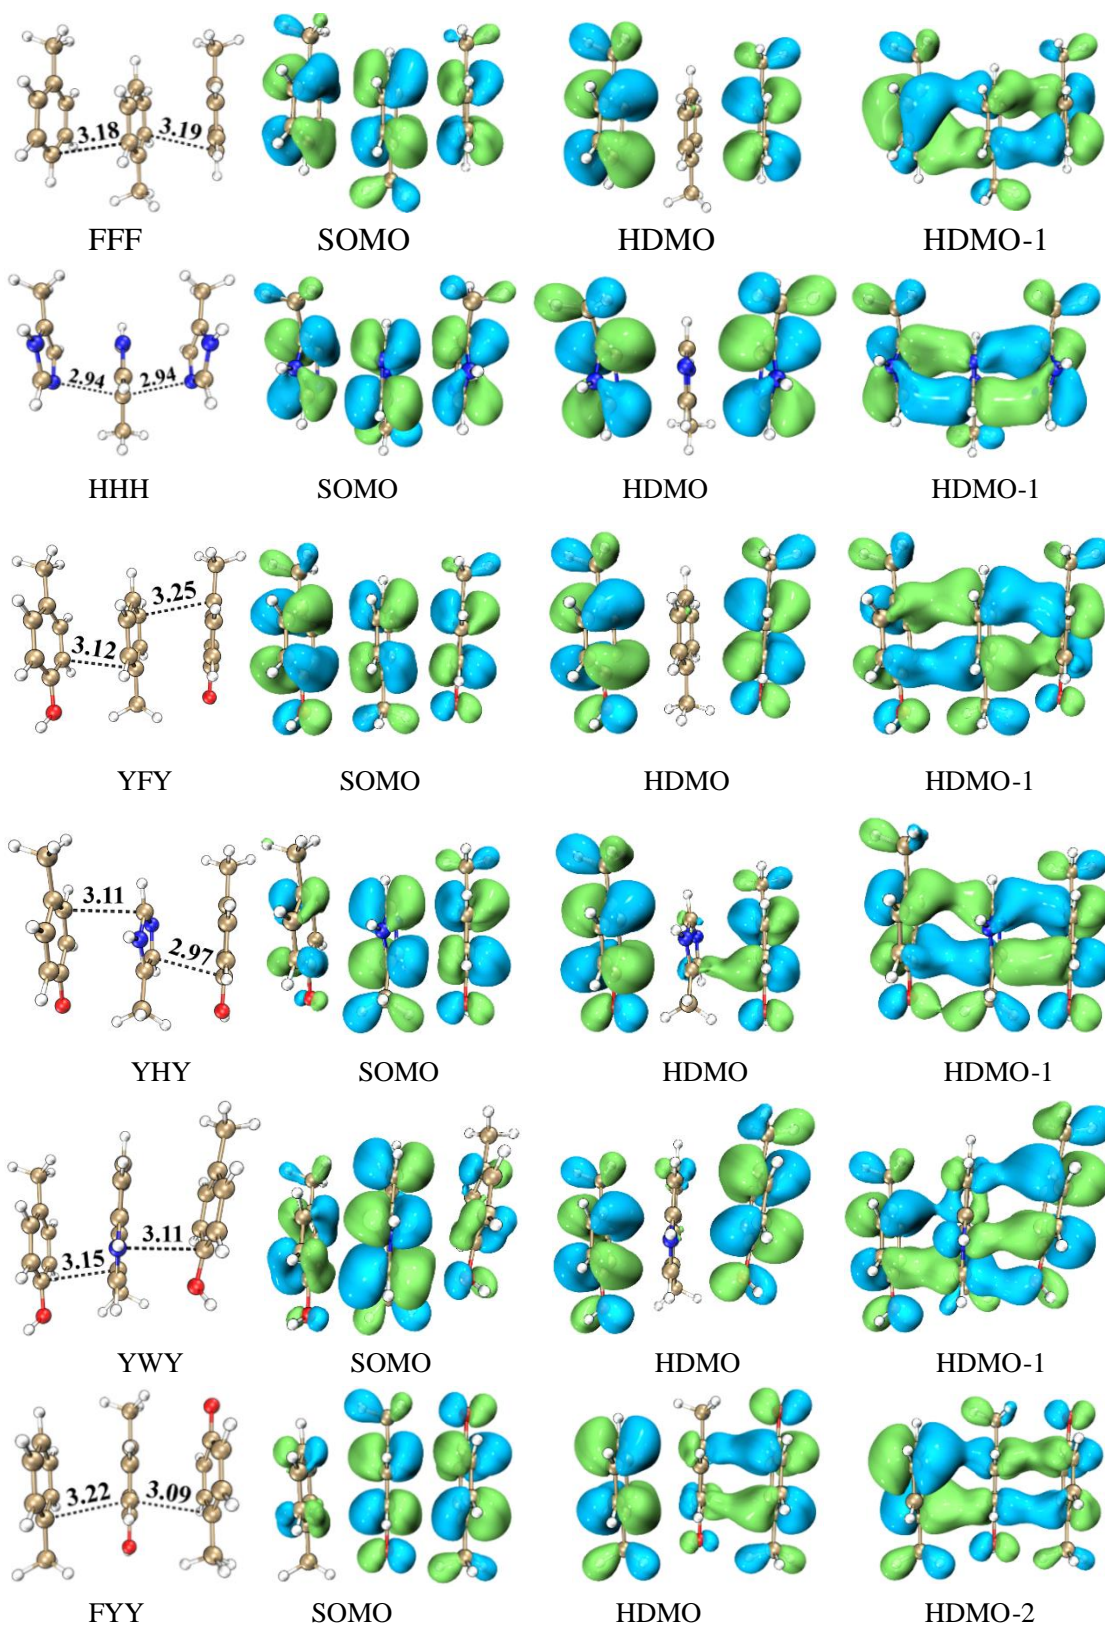

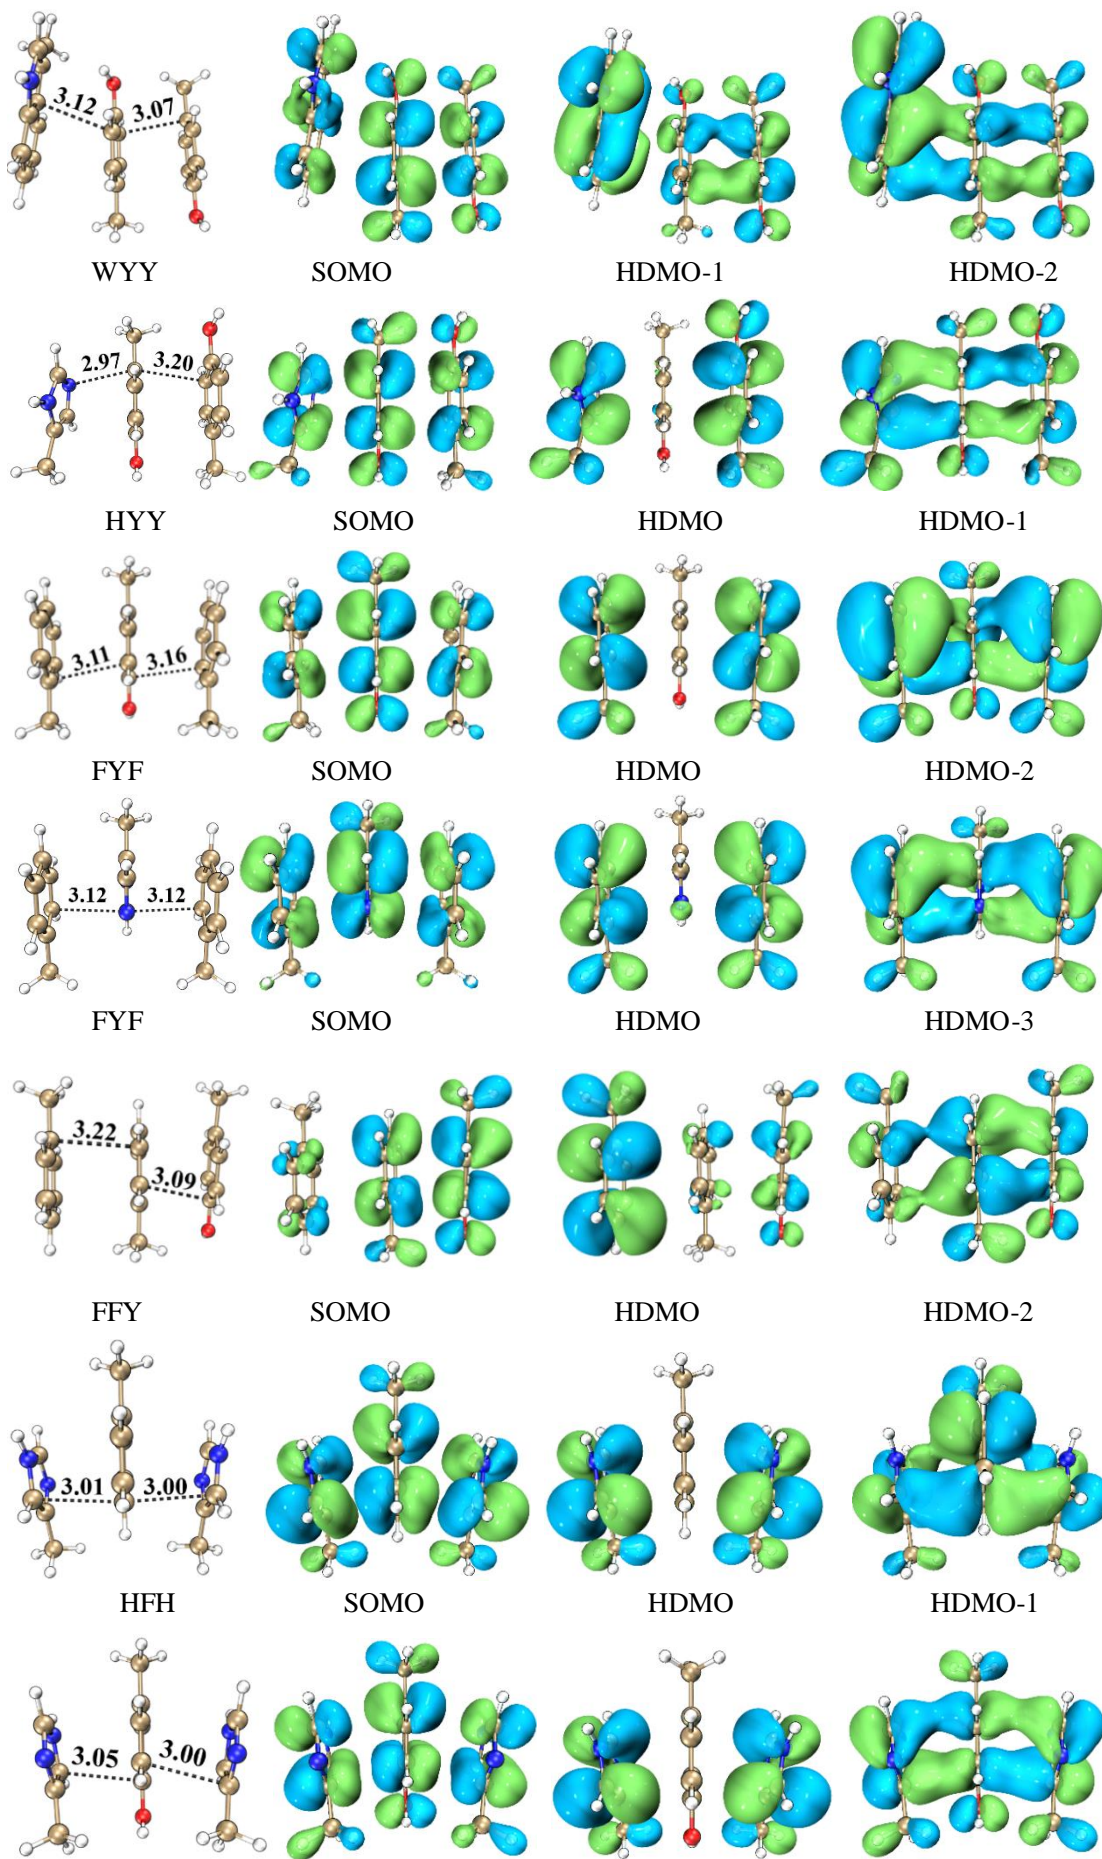

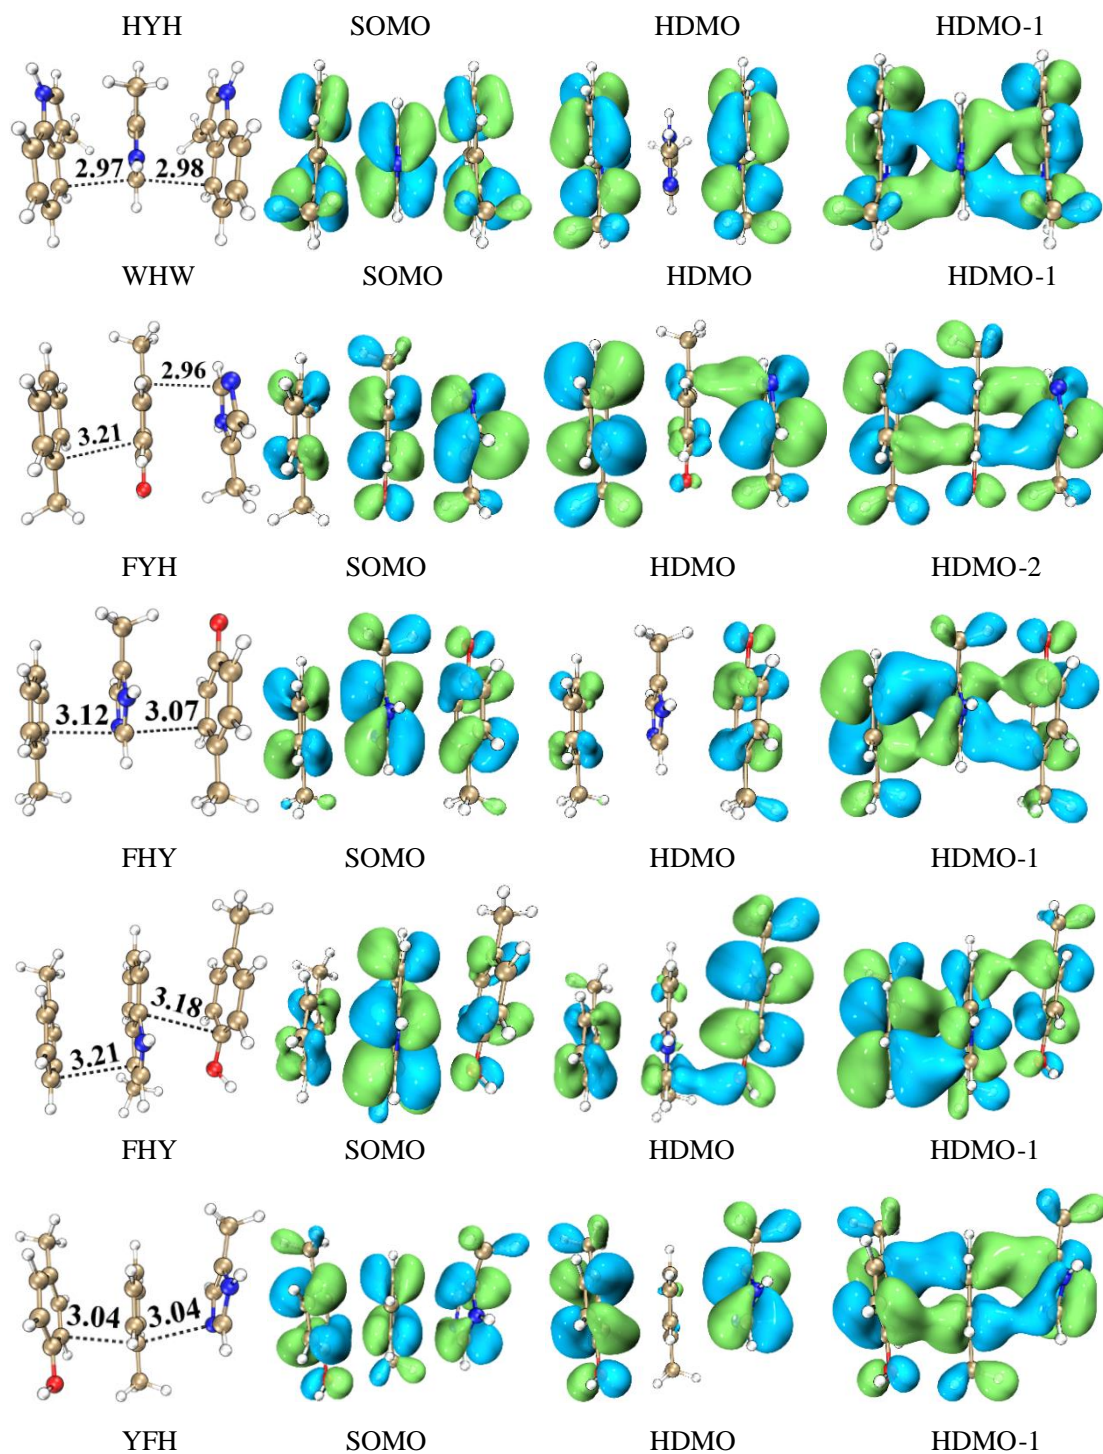

**Figure S9.** The structures of the three- $\pi$  five-electron bindings for simple models with the corresponding SOMO, HDMO and HDMO-X.

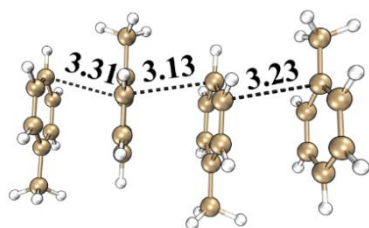

FFFF

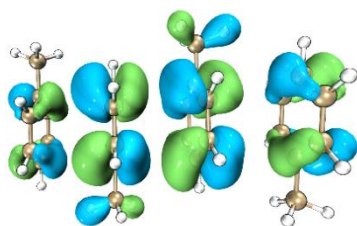

SOMO

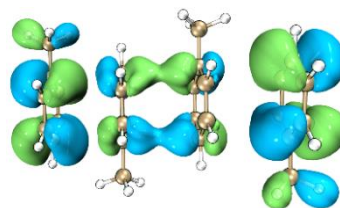

HDMO

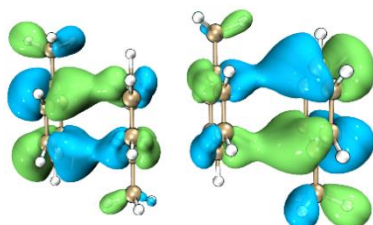

HDMO-1

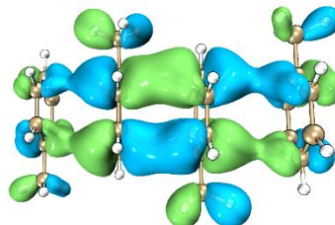

HDMO-4

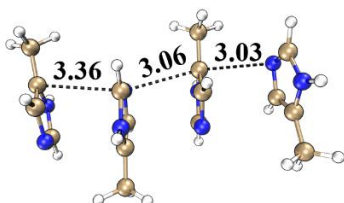

HHHH

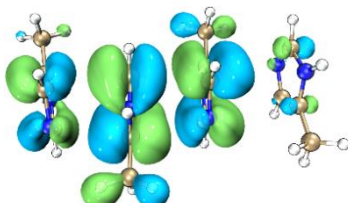

SOMO

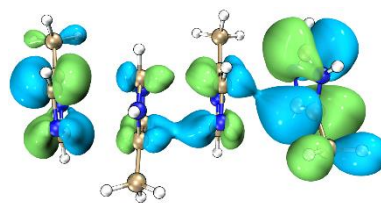

HDMO

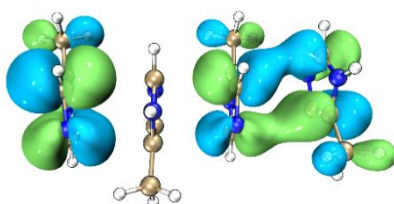

HDMO-1

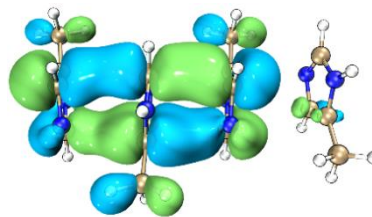

HDMO-2

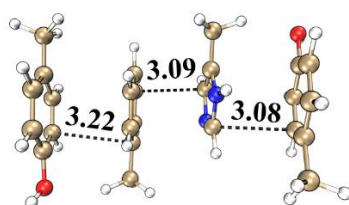

YFHY

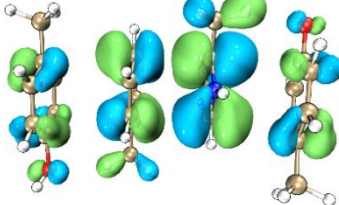

SOMO

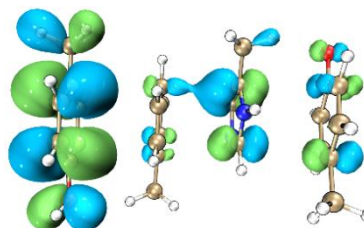

HDMO

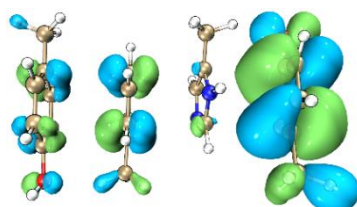

HDMO-1

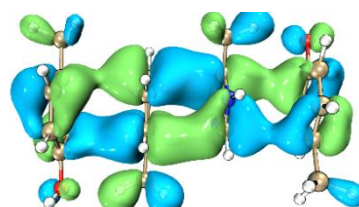

HDMO-3

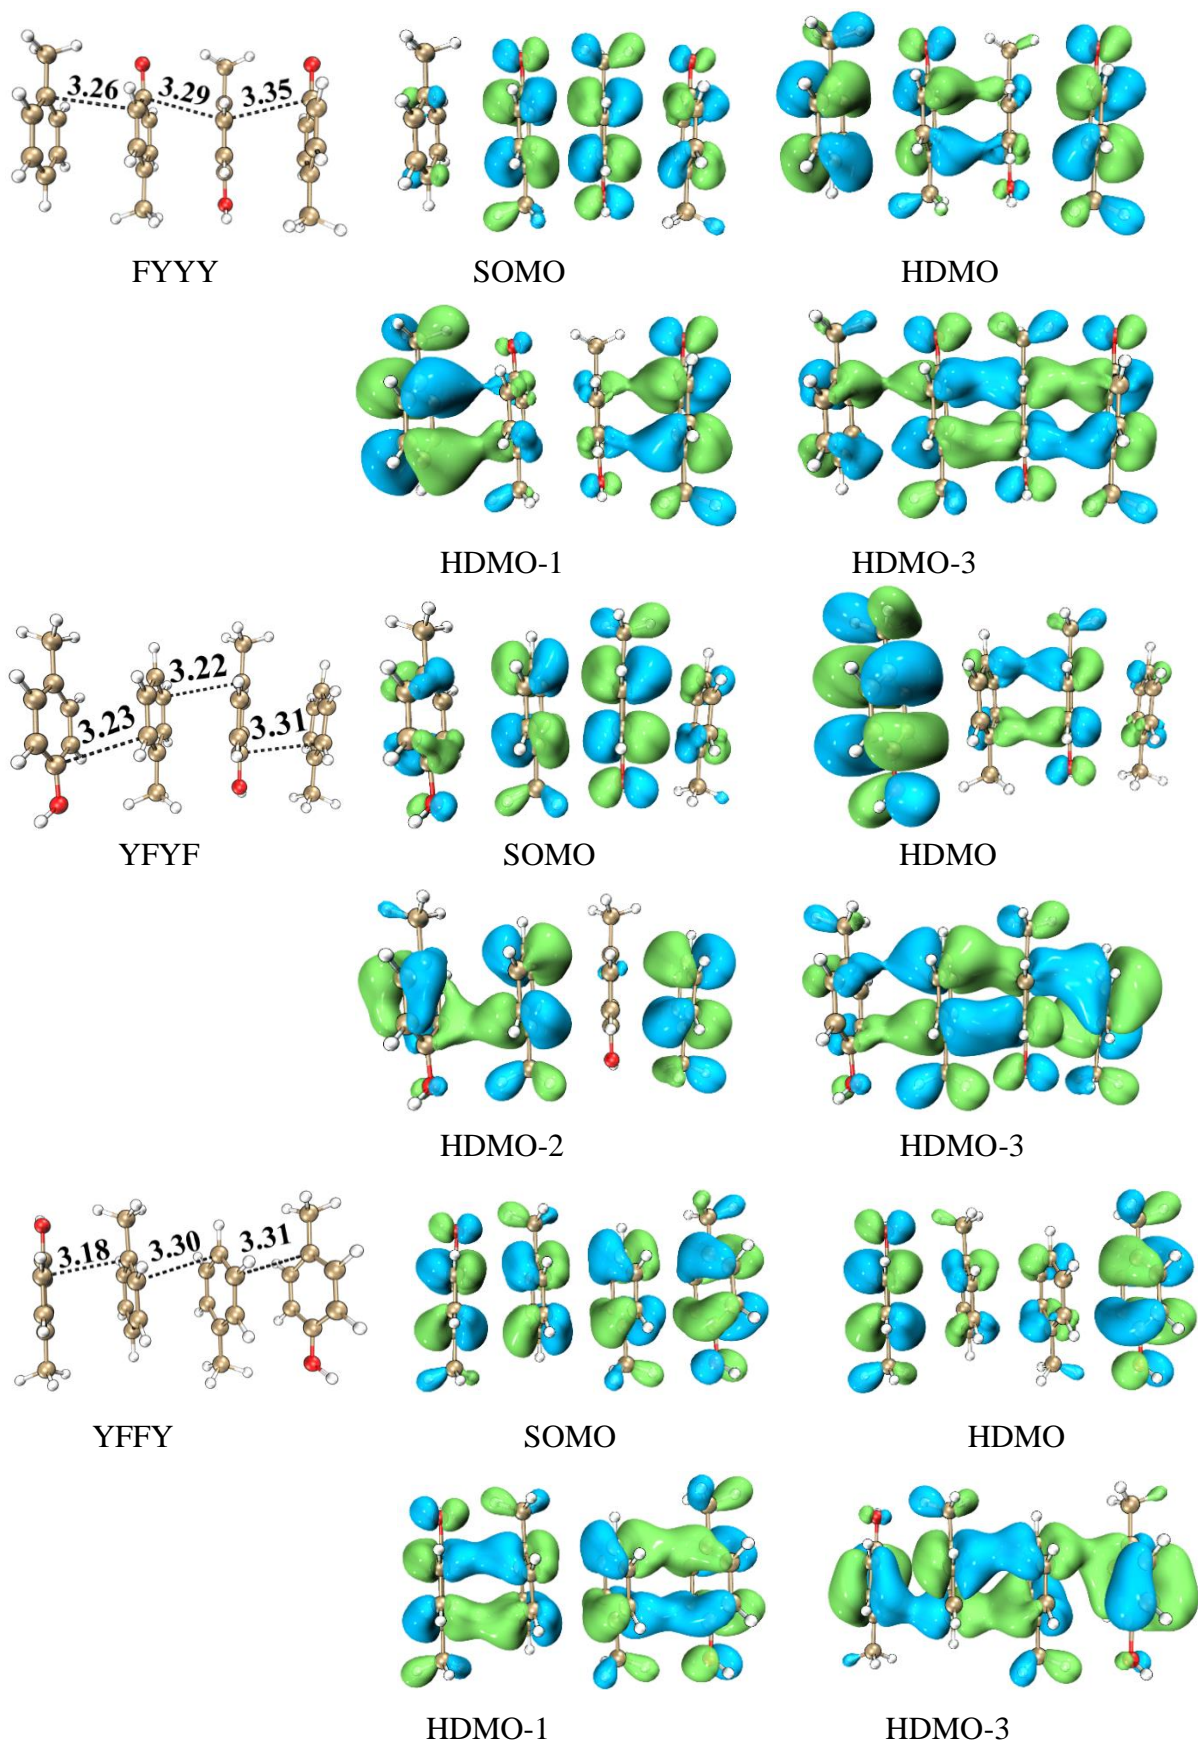

**Figure S10.** The structures of the  $\pi:\pi:\cdot:\pi:\pi\leftrightarrow\pi:\pi:\pi:\cdot:\pi$  four- $\pi$  seven-electron binding for the simple models with the corresponding front MOs.

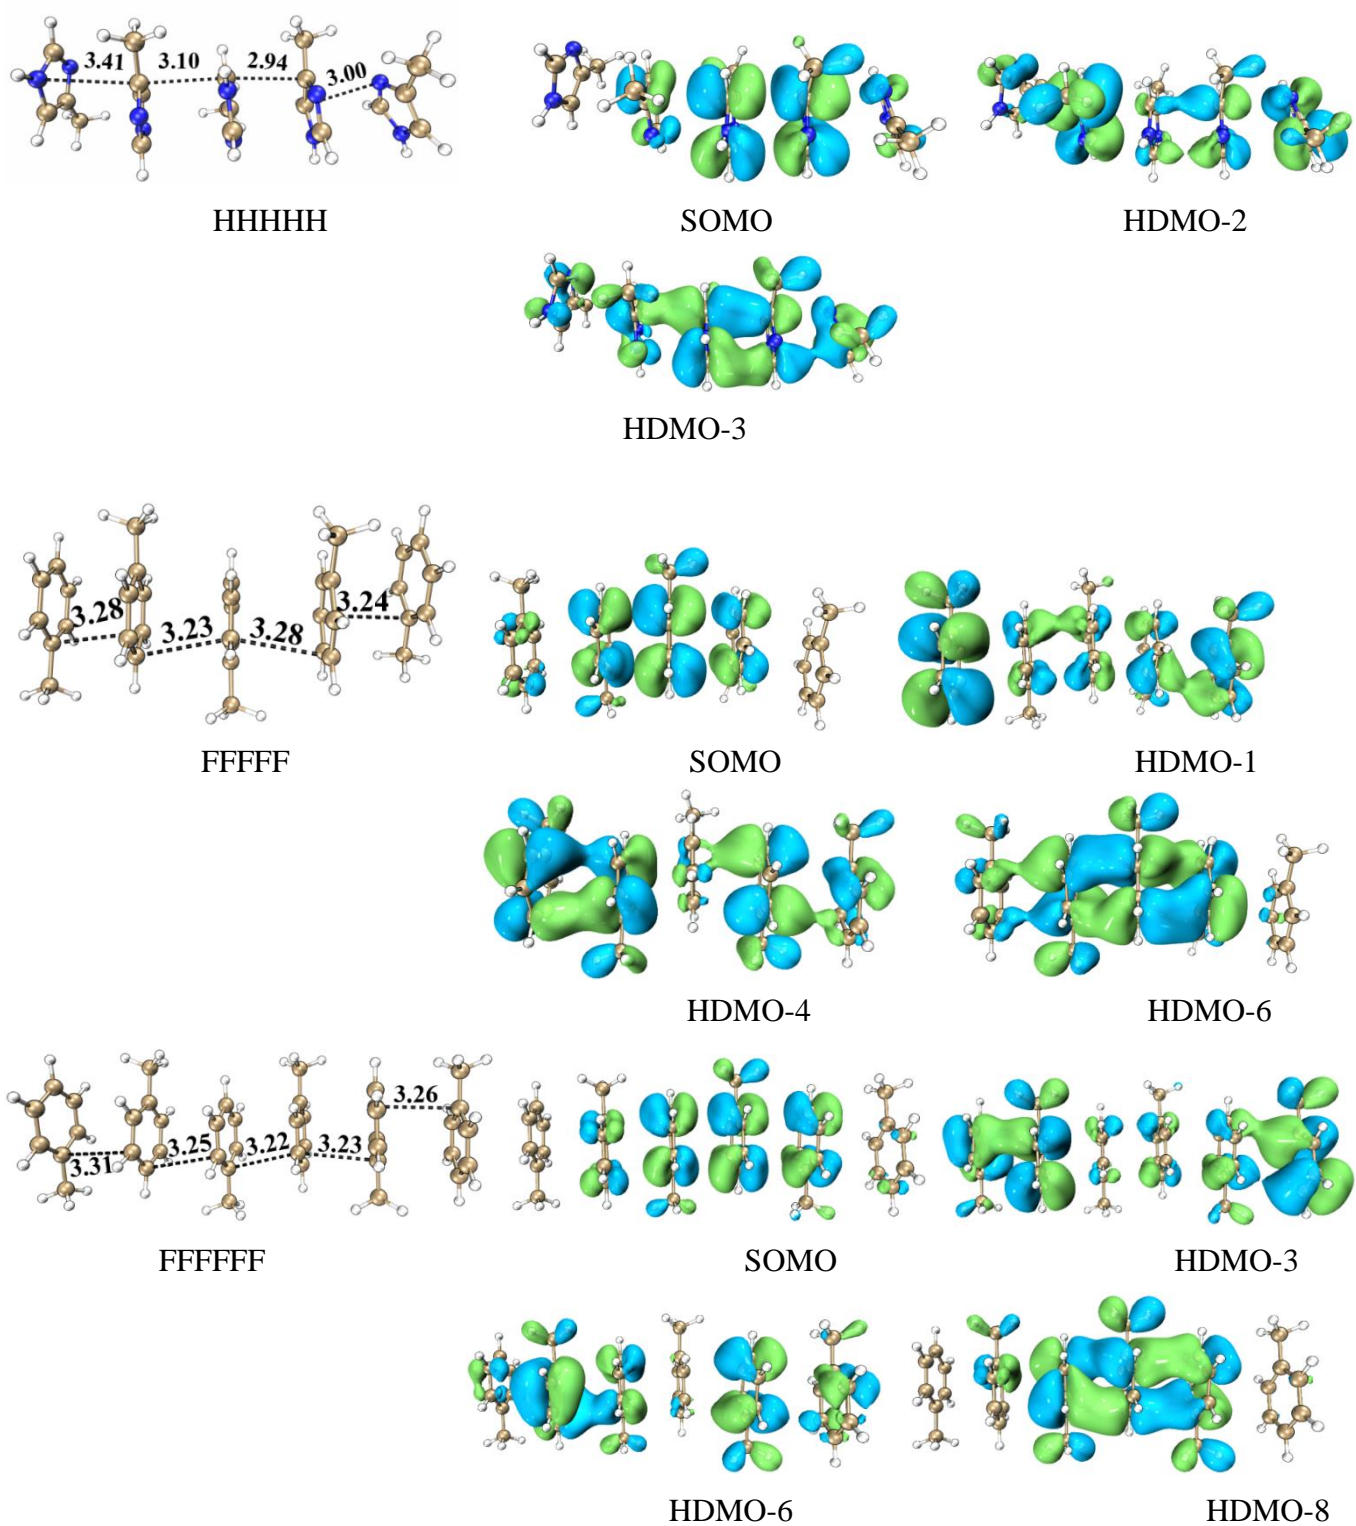

**Figure S11.** The structures of the five- $\pi$  and six- $\pi$  stacking systems for the simple models with the corresponding front MOs.



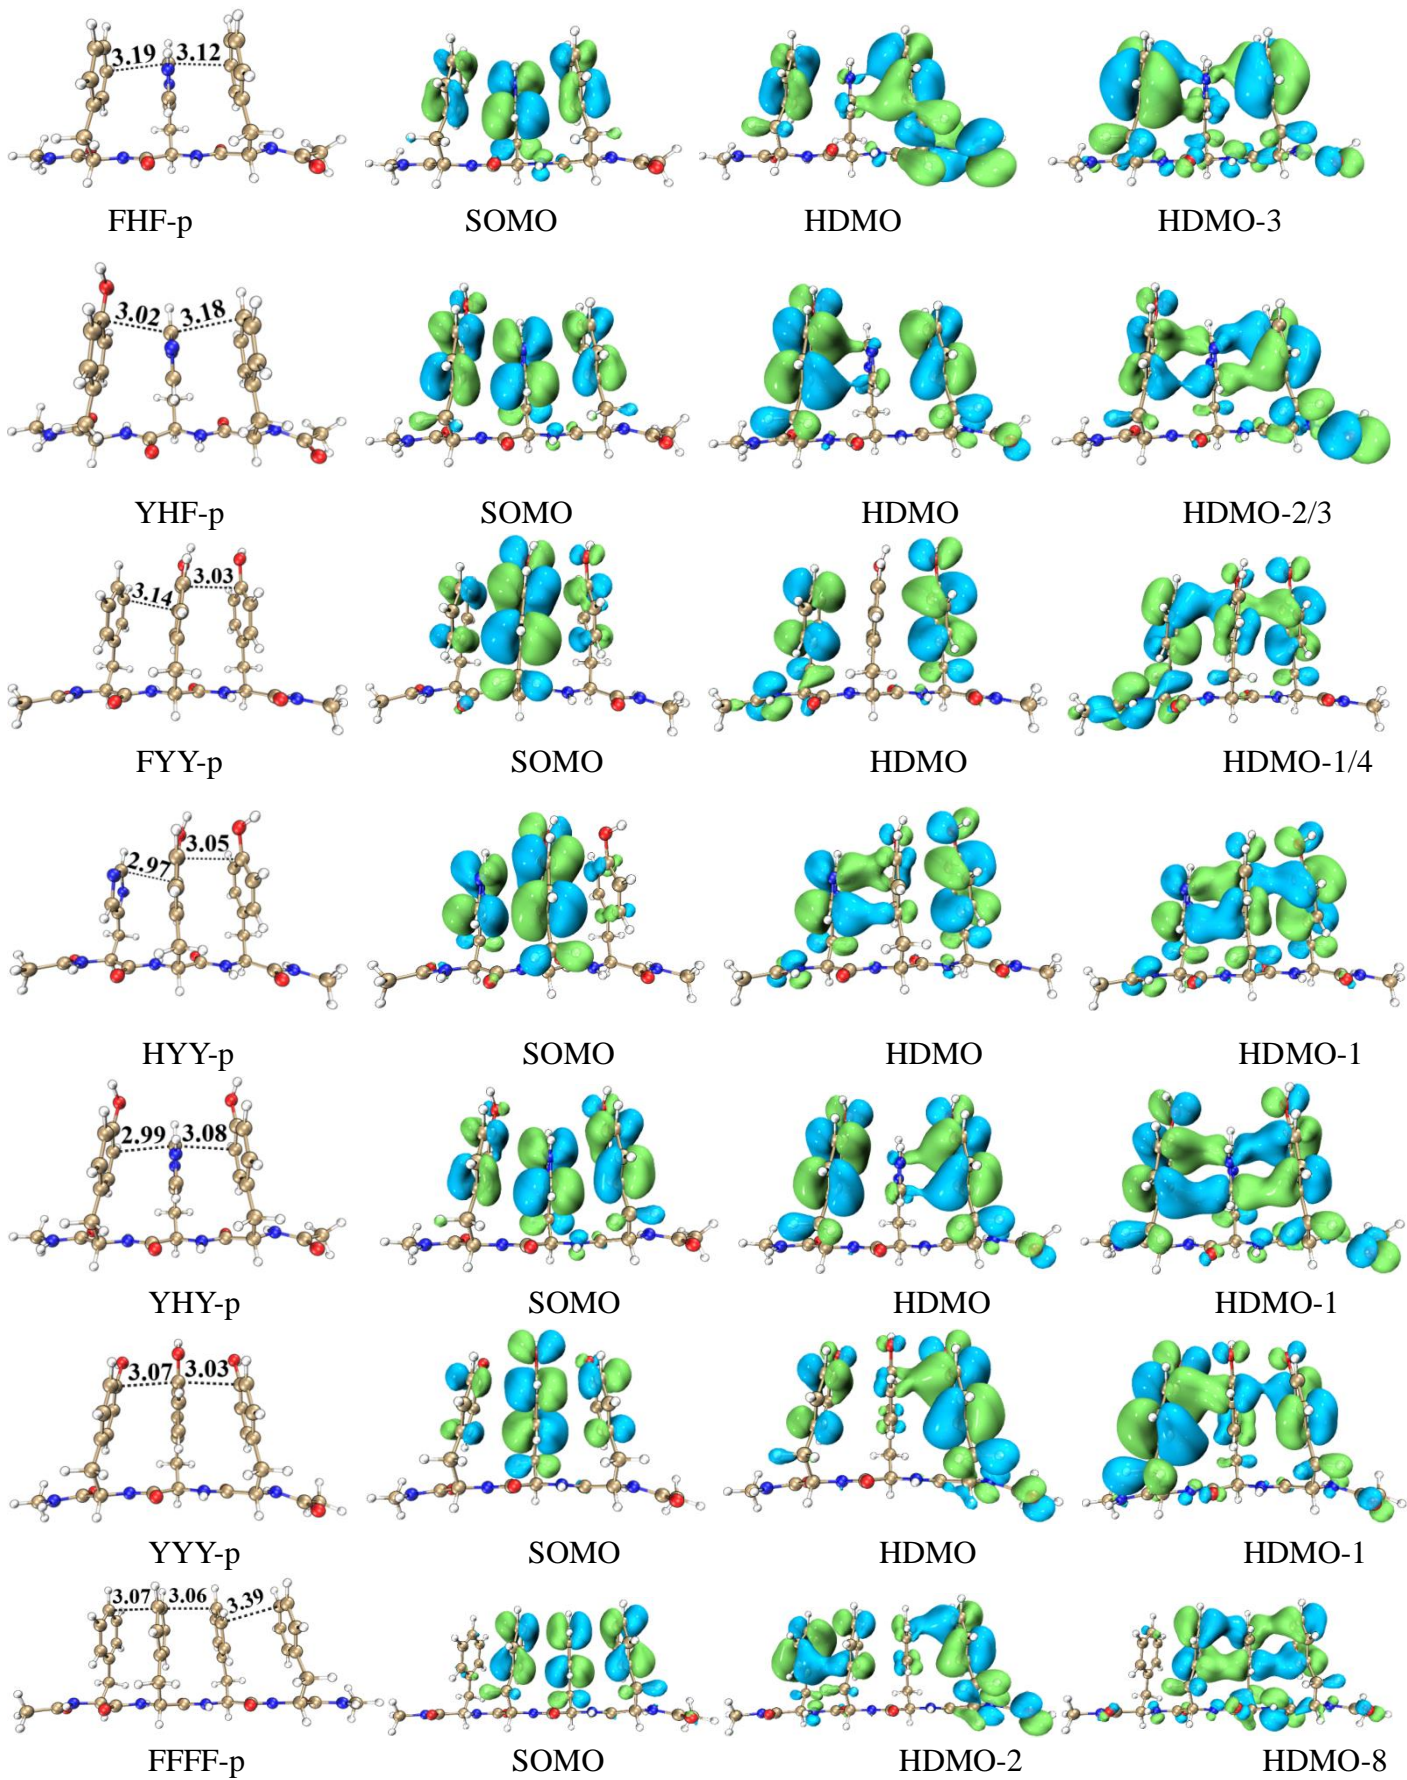

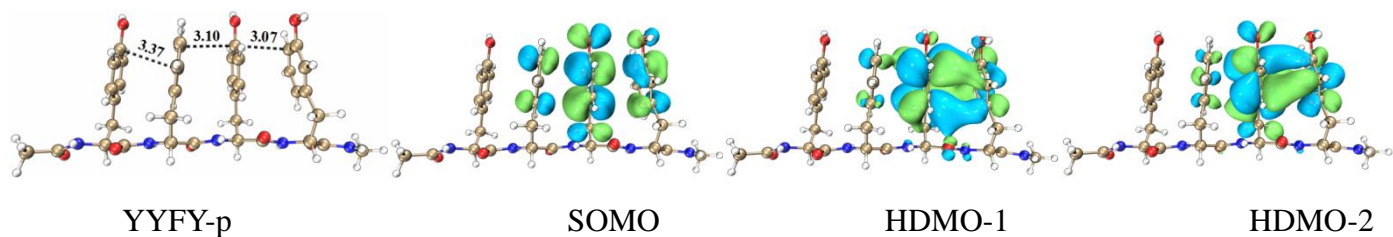

**Figure S12.** The structures of one-chain models and the corresponding SOMO, HDMO and HDMO-X.

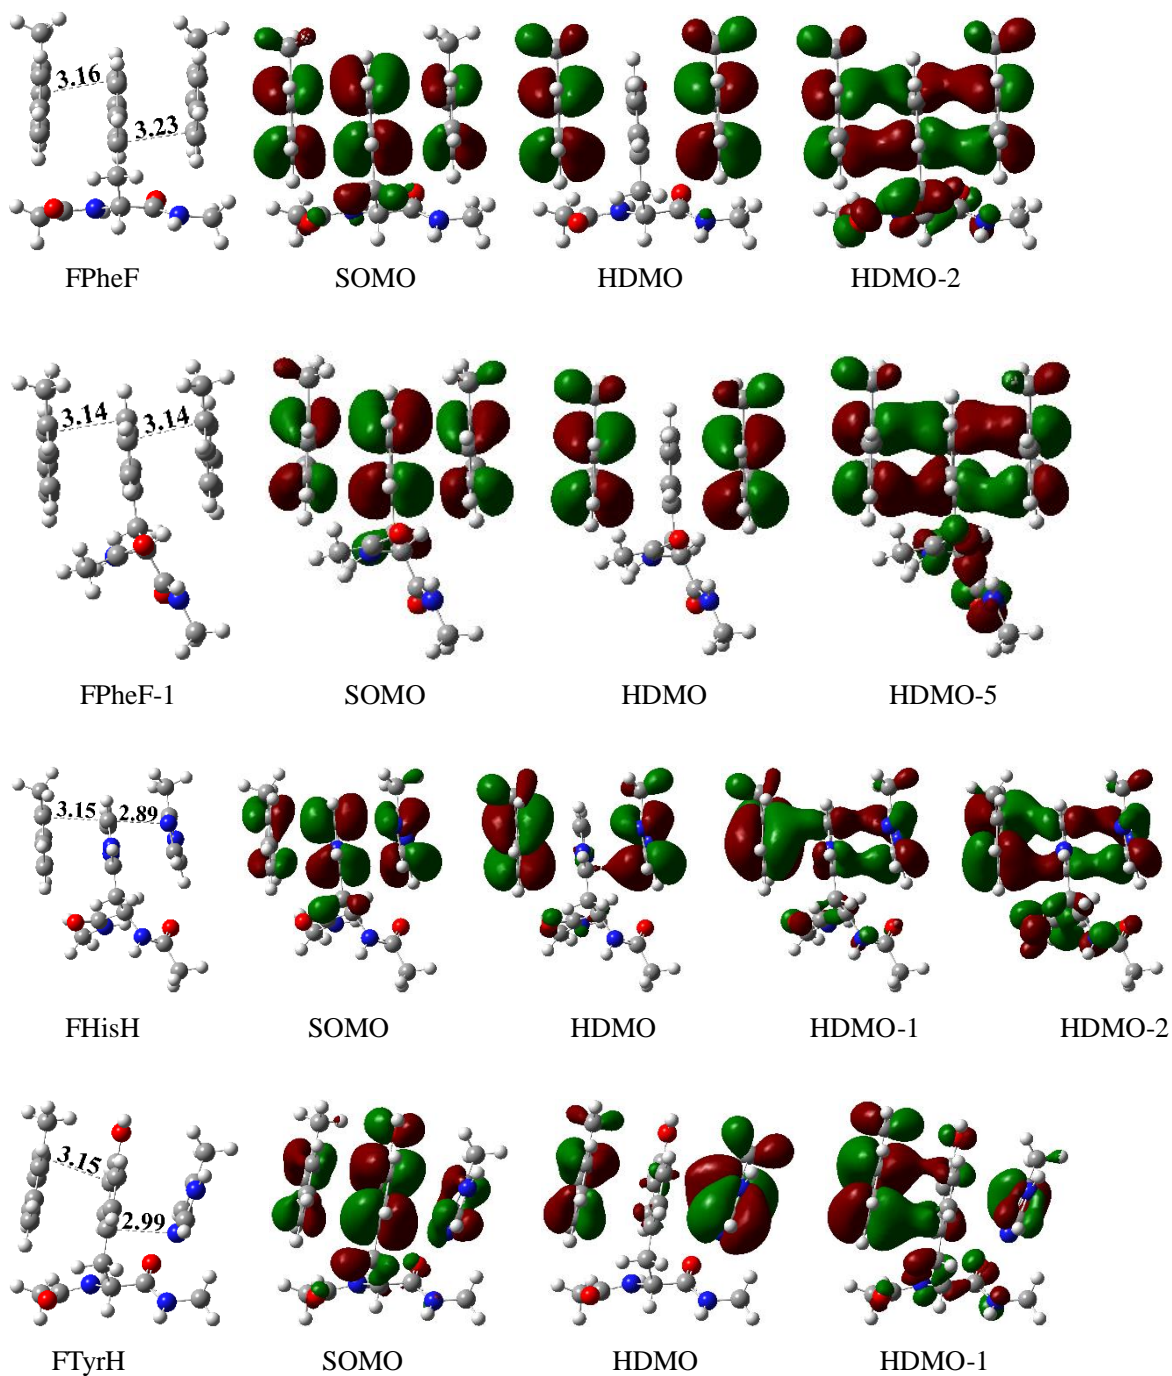

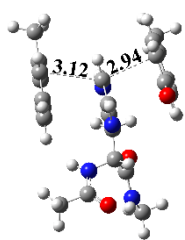

FHisY

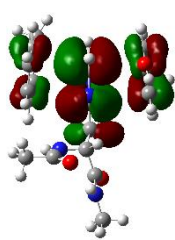

SOMO

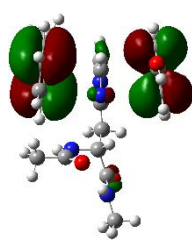

HDMO-4

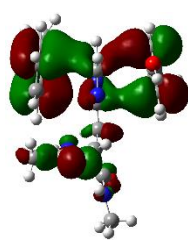

HDMO-6

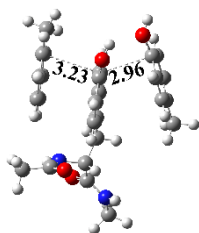

FTyrY

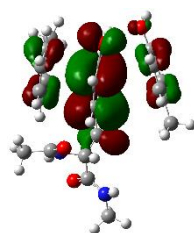

SOMO

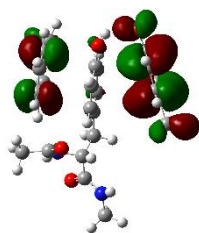

HDMO

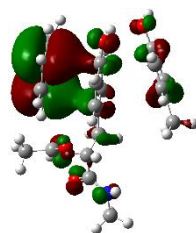

HDMO-2

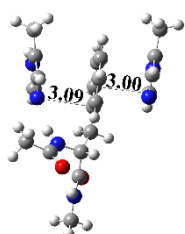

HPheH

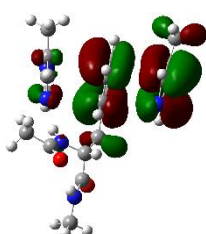

SOMO

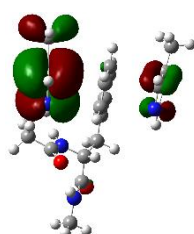

HDMO-2

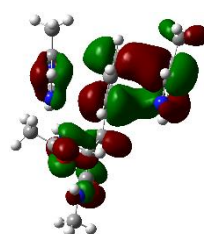

HDMO-4

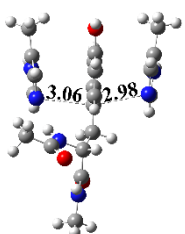

HTyrH

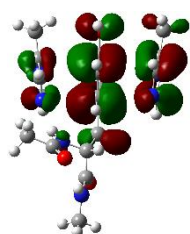

SOMO

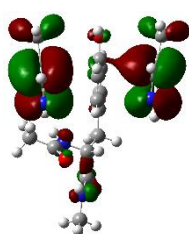

HDMO-2

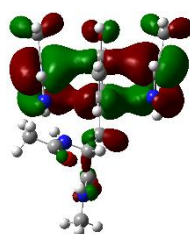

HDMO-3

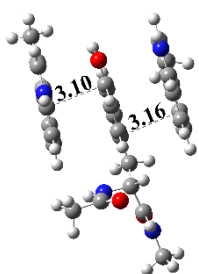

WTyrW

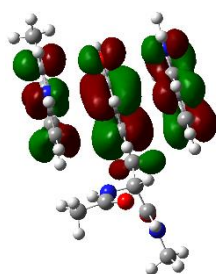

SOMO

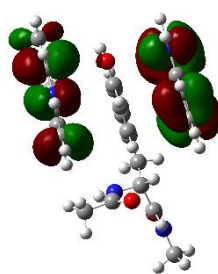

HDMO

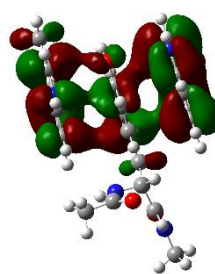

HDMO-1

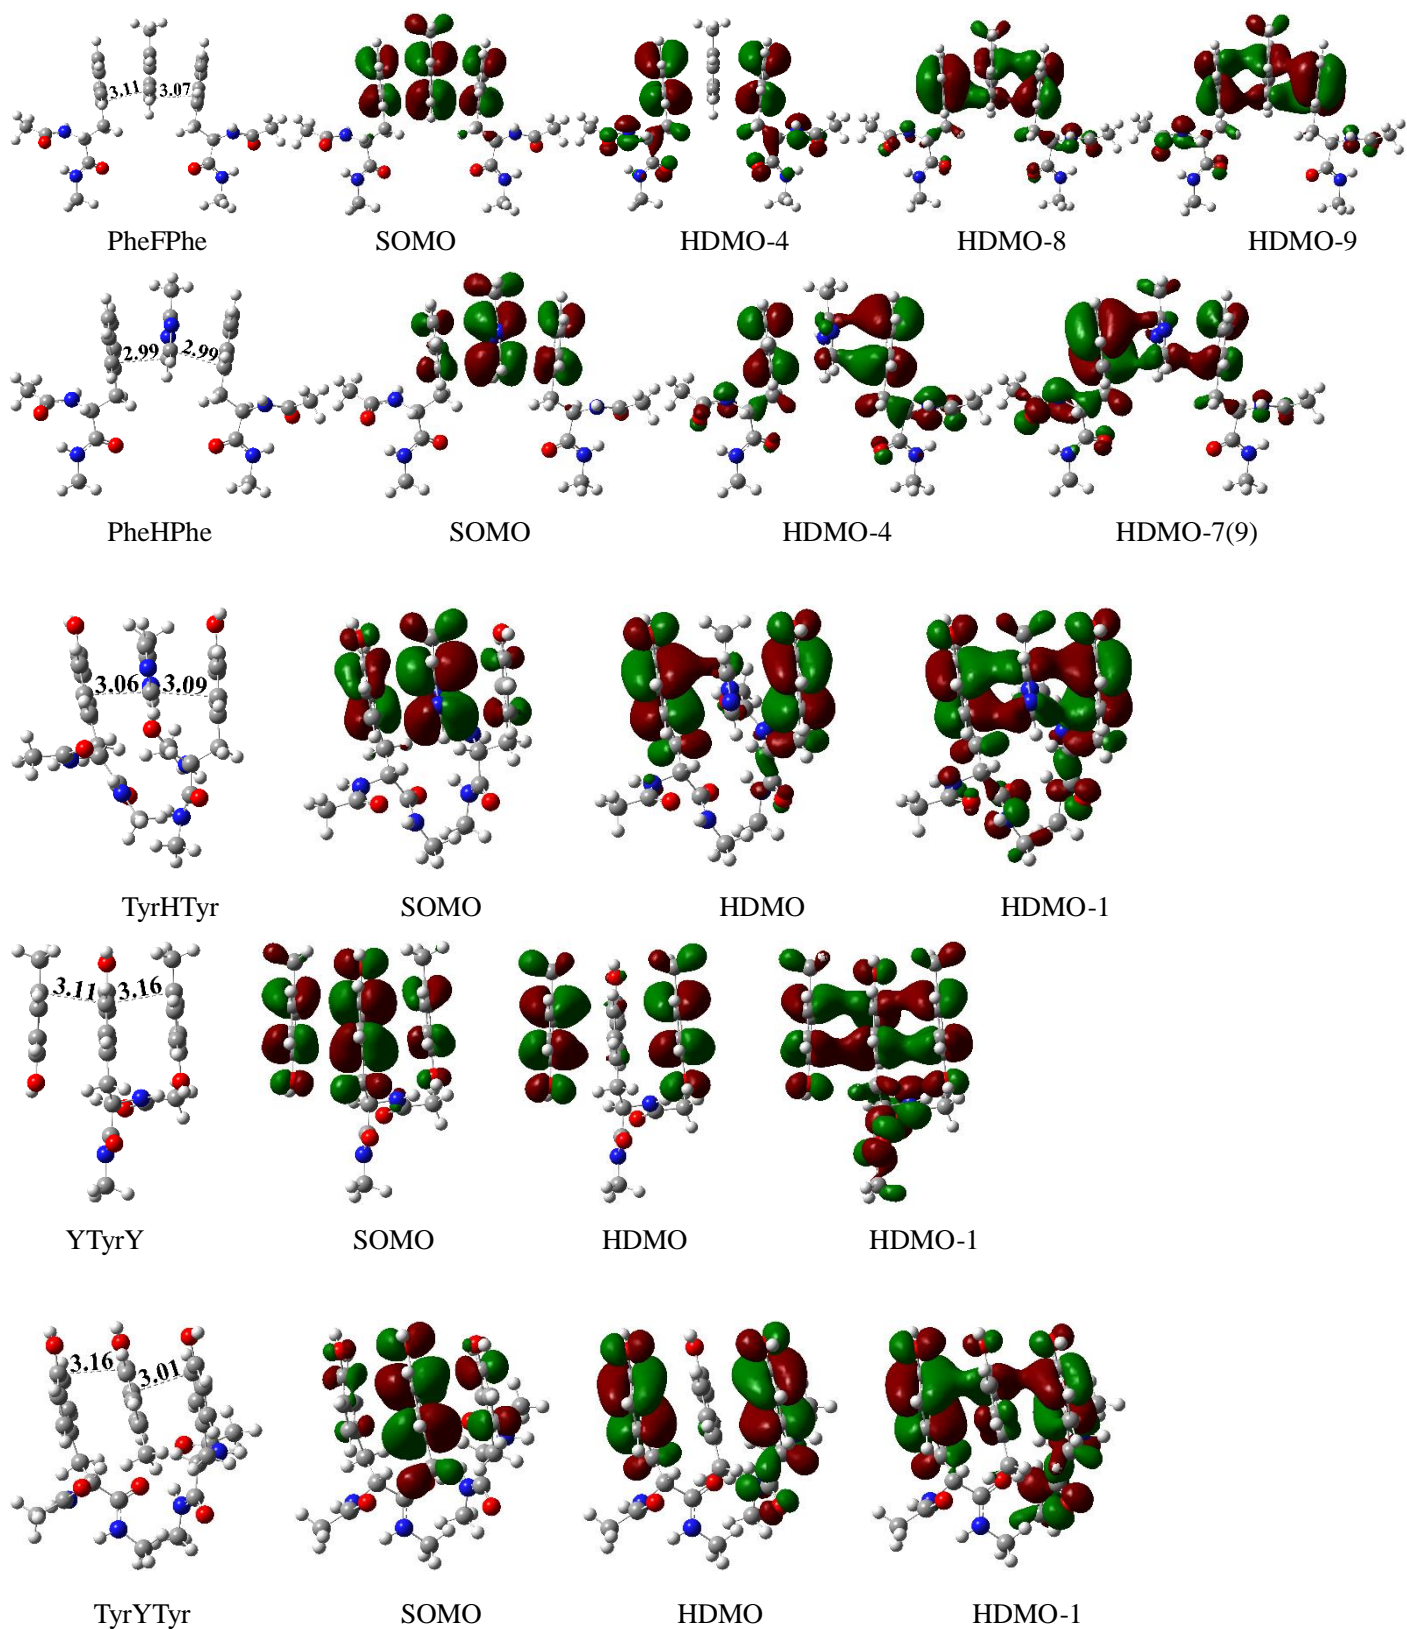

**Figure S13.** The cases for the formations of  $\pi \cdots \pi : \pi \leftrightarrow \pi : \pi \cdots \pi$  binding in proteins with three aromatic side chains in different peptide chains.
